# Supplementary material for: Reproduction of contagious caprine pleuropneumonia reveals the ability of convalescent sera to reduce hydrogen peroxide production in vitro
Source: PubMed Central journal article supplement (PMC6368817; doi:10.1186/s13567-019-0628-0), 2019-02-08

# A

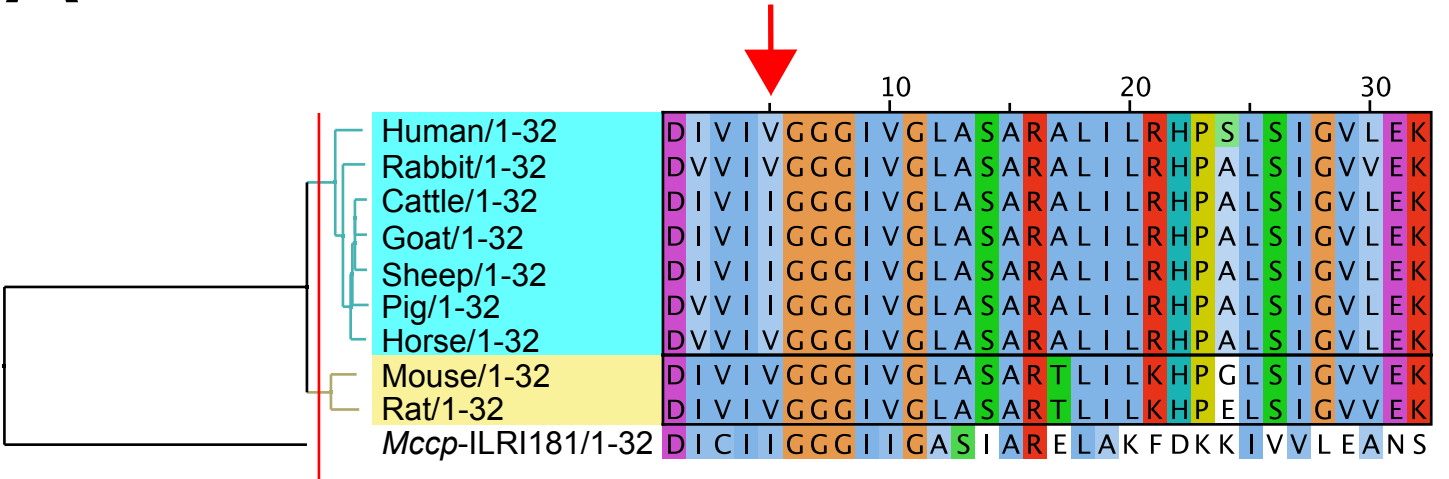

# B

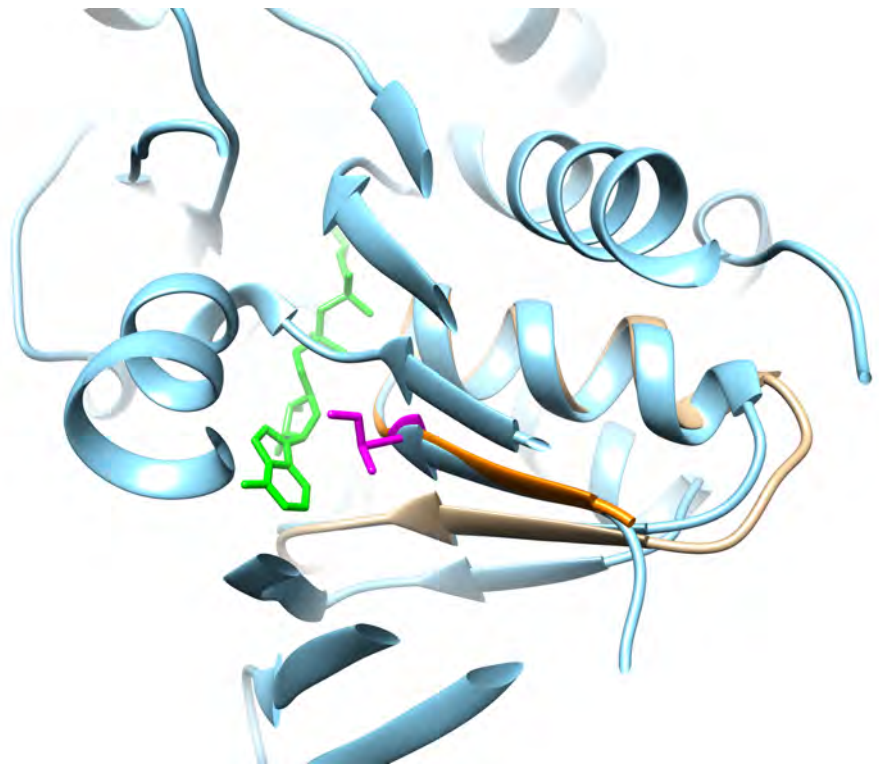

Supplement: 13567_2019_628_MOESM1_ESM.pdf [file 13567_2019_628_MOESM1_ESM.pdf]
