# Supplementary material for: Reproduction of contagious caprine pleuropneumonia reveals the ability of convalescent sera to reduce hydrogen peroxide production in vitro
Source: PubMed Central journal article supplement (PMC6368817; doi:10.1186/s13567-019-0628-0), 2019-02-08
Supplement: 13567_2019_628_MOESM6_ESM.pdf [file 13567_2019_628_MOESM6_ESM.pdf]

**A**

|                     | Animal ID |           |           |       |       |           |           |       |       |       |
|---------------------|-----------|-----------|-----------|-------|-------|-----------|-----------|-------|-------|-------|
| Days post infection | CK042     | CM043     | CM048     | CM049 | CM124 | CM145     | CM166     | CM180 | CM186 | CM189 |
| -2                  | 23        | 20        | 32        | 12    | 18    | 26        | 21        | 5     | 16    | 22    |
| 0                   | 28        | 29        | 30        | 19    | 27    | 39        | 22        | 21    | 30    | 32    |
| 4                   | 32        | 36        | 23        | 23    | 25    | 35        | 13        | 25    | 29    | 33    |
| 7                   | 36        | 49        | 27        | 17    | 26    | 37        | 26        | 54    | 32    | 34    |
| 11                  | 32        | <b>71</b> | 41        | 52    | 32    | 47        | 44        | 52    | 53    | 42    |
| 14                  |           | <b>75</b> | <b>63</b> |       |       | <b>60</b> | <b>68</b> | 41    |       |       |
| 18                  |           | <b>77</b> | <b>79</b> |       |       | <b>84</b> | <b>71</b> |       |       |       |
| 21                  |           | <b>84</b> | <b>83</b> |       |       | <b>85</b> | <b>78</b> |       |       |       |
| 25                  |           | <b>87</b> | <b>83</b> |       |       | <b>84</b> | <b>84</b> |       |       |       |
| 28                  |           | <b>89</b> | <b>88</b> |       |       | <b>88</b> | <b>79</b> |       |       |       |
| 31                  |           | <b>80</b> | <b>79</b> |       |       | <b>77</b> | <b>73</b> |       |       |       |

**B**

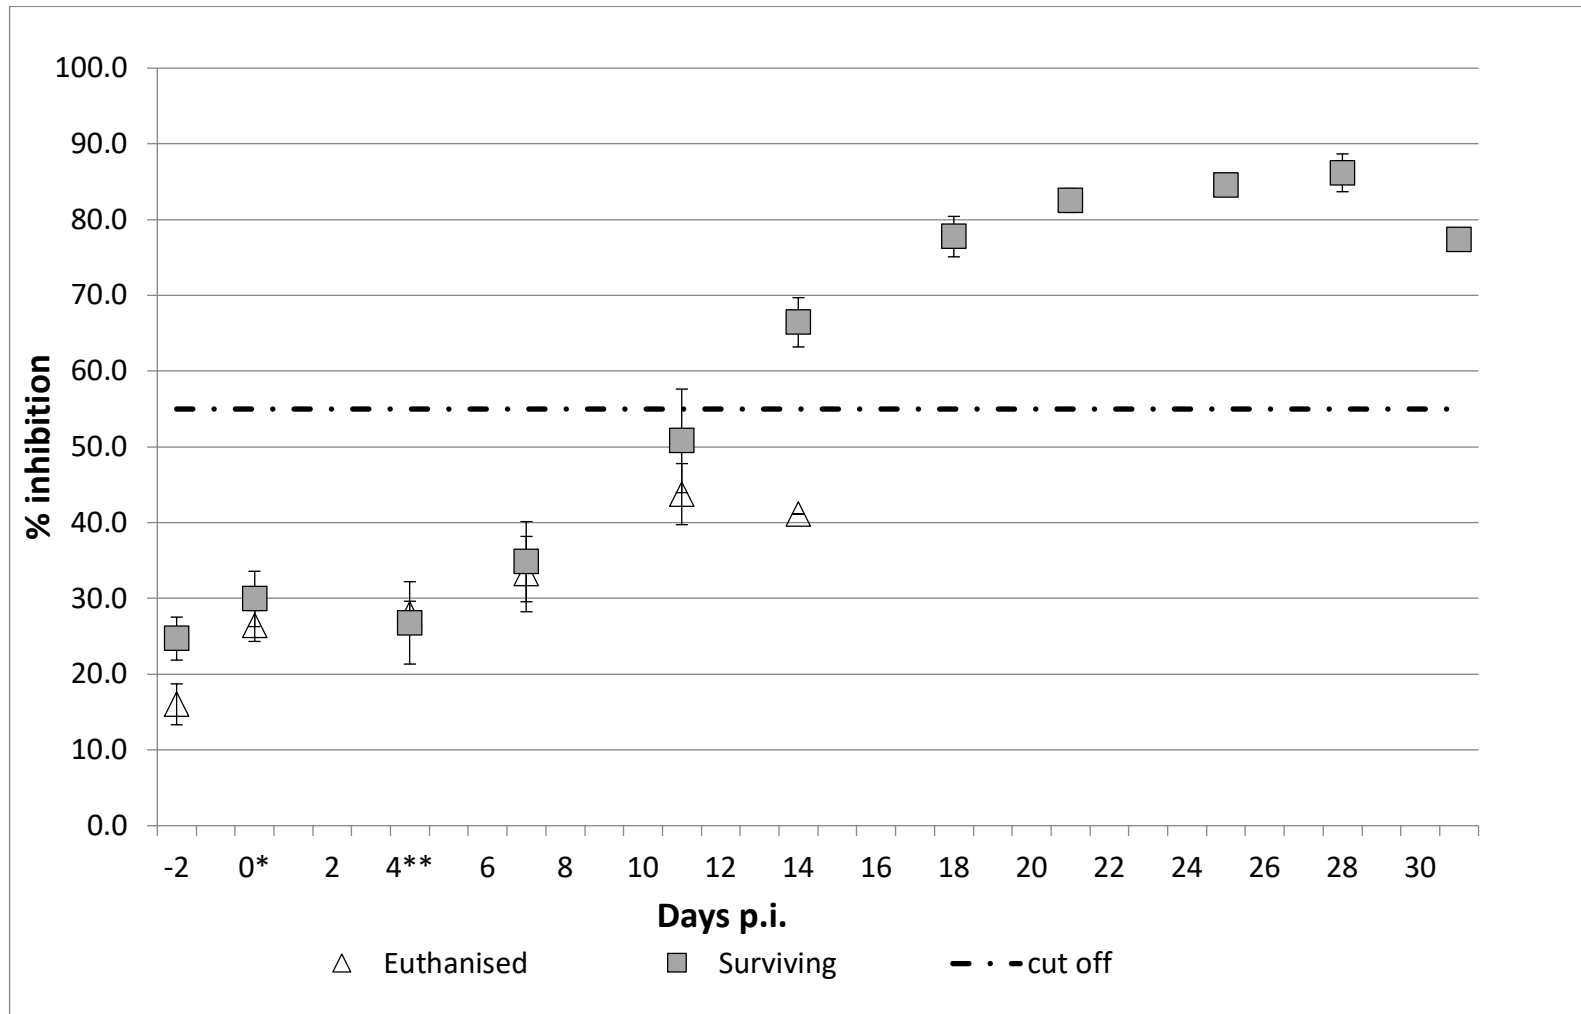

**C**

|                     | Animal ID |       |       |       |       |
|---------------------|-----------|-------|-------|-------|-------|
| Days post infection | CM233     | CM251 | CM253 | CM260 | CM261 |
| -3                  | 37        | 50    | 37    | 33    | 44    |
| 1                   | 31        | 47    | 36    | 30    | 50    |
| 4                   | 42        | 48    | 27    | 27    | 47    |
| 8                   | 34        | 51    | 30    | 36    | 38    |
| 11                  | 30        | 42    | 36    | 33    | 51    |
| 15                  | 42        | 47    | 44    | 33    | 49    |
| 18                  | 38        | 43    | 37    | 36    | 54    |
| 22                  | 18        | 25    | 27    | 23    | 32    |
| 25                  | 29        | 25    | 31    | 25    | 28    |
| 29                  | 26        | 26    | 28    | 29    | 44    |
| 32                  | 18        | 38    | 27    | 20    | 30    |
| 35                  | 40        | 34    | 35    | 33    | 42    |
